# Supplementary material for: Identification of 5-Gene Signature Improves Lung Adenocarcinoma Prognostic Stratification Based on Differential Expression Invasion Genes of Molecular Subtypes
Source: Biomed Res Int. 2020 Dec 31;2020:8832739. doi: 10.1155/2020/8832739 (PMC7790577; doi:10.1155/2020/8832739)
Supplement: Supplementary Materials — Figure S1: KM survival curve of the six published immunoinfiltrating molecular subtypes. Figure S2: immune cell scores (B lineage, cytotoxic lymphocytes, endothelial cells, fibroblasts, monocytic lineage, myeloid dendritic cells, and neutrophils) of each sample. Figure S3: A: with the gradual increase of lambda, the number of independent variable coefficients approaching 0 also increases gradually. B: when lambda = 0.02797, the model reached the optimal value. Figure S4: the expression of five genes made a significant prognosis difference between the risk of high and low expression in the sample. Figure S5: the differences of our models in the chemotherapy and radiotherapy samples. Table S1: The sample clinical information of databases. [file 8832739.f1.zip › Figure S4.pdf]

A

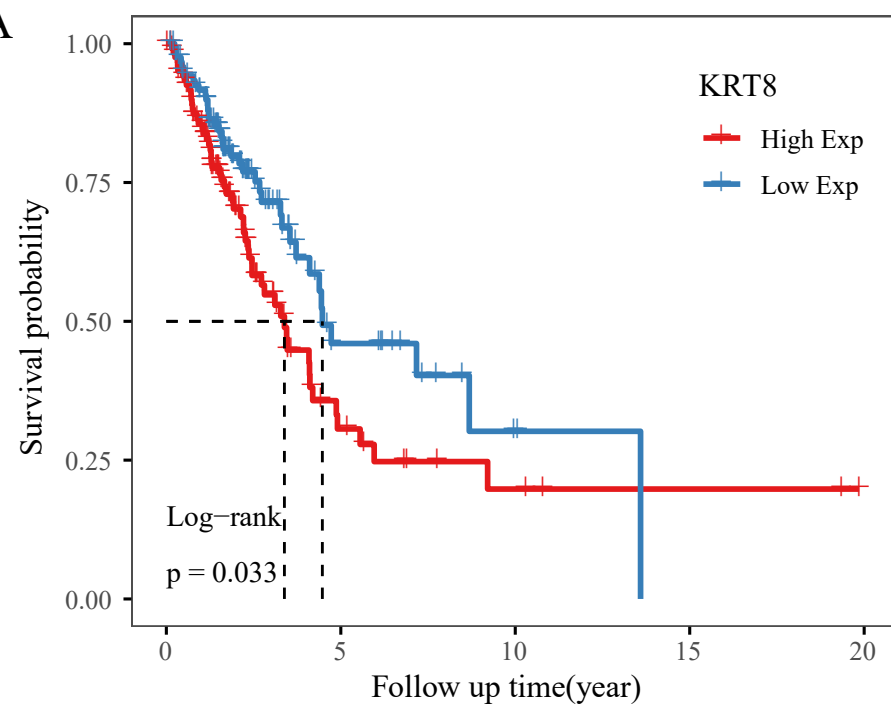

Number at risk

|          |     |    |    |    |    |
|----------|-----|----|----|----|----|
| High Exp | 125 | 12 | 4  | 2  | 0  |
| Low Exp  | 125 | 13 | 2  | 0  | 0  |
|          | 0   | 5  | 10 | 15 | 20 |

Follow up time(year)

B

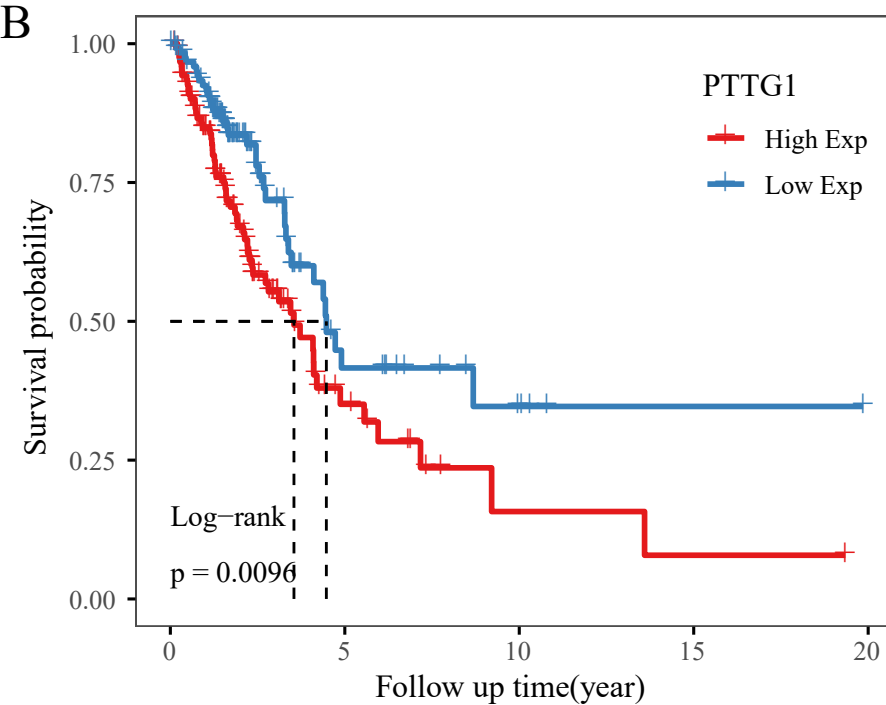

Number at risk

|          |     |    |    |    |    |
|----------|-----|----|----|----|----|
| High Exp | 125 | 12 | 2  | 1  | 0  |
| Low Exp  | 125 | 13 | 4  | 1  | 0  |
|          | 0   | 5  | 10 | 15 | 20 |

Follow up time(year)

C

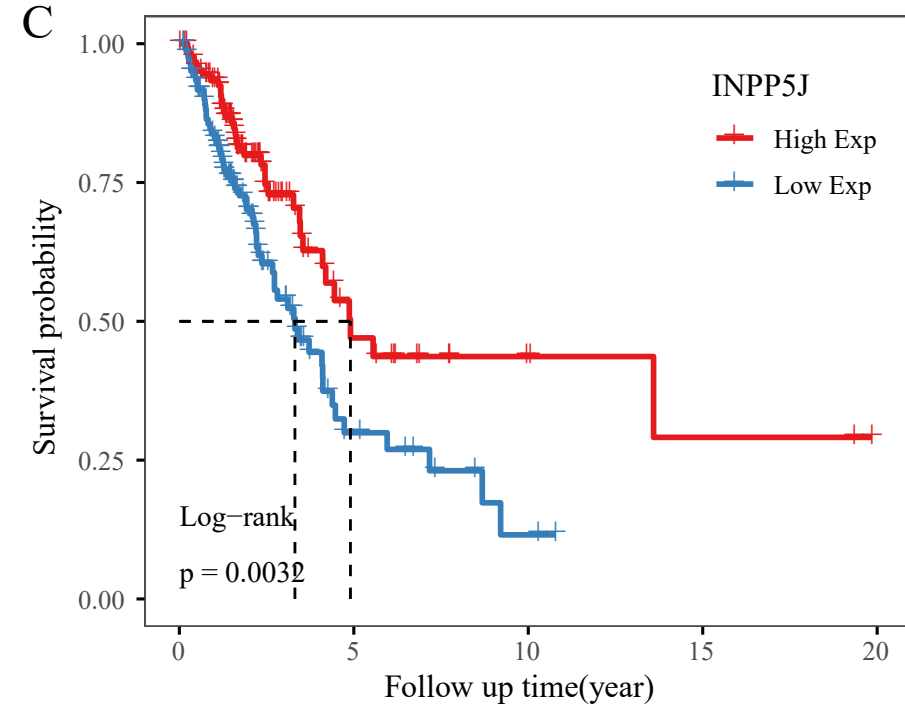

Number at risk

|          |     |    |    |    |    |
|----------|-----|----|----|----|----|
| High Exp | 125 | 14 | 4  | 2  | 0  |
| Low Exp  | 125 | 11 | 2  | 0  | 0  |
|          | 0   | 5  | 10 | 15 | 20 |

Follow up time(year)

D

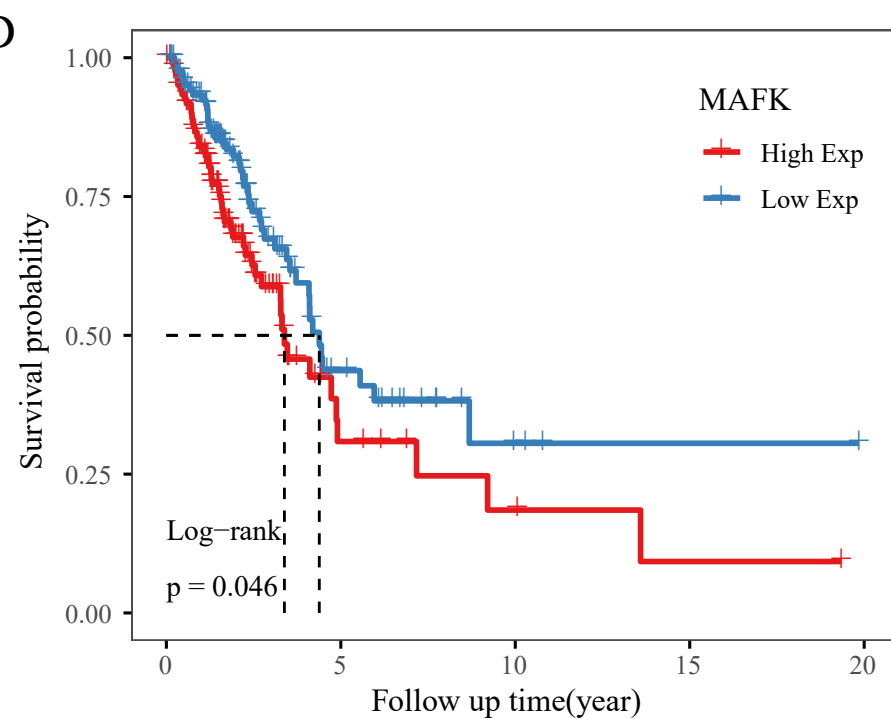

Number at risk

|          |     |    |    |    |    |
|----------|-----|----|----|----|----|
| High Exp | 125 | 8  | 3  | 1  | 0  |
| Low Exp  | 125 | 17 | 3  | 1  | 0  |
|          | 0   | 5  | 10 | 15 | 20 |

Follow up time(year)

E

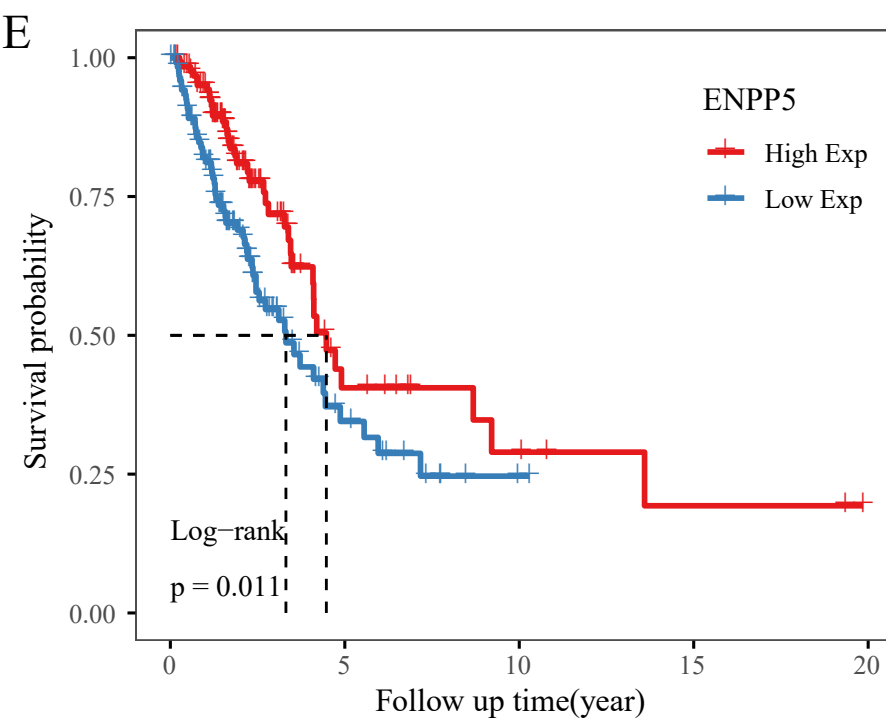

Number at risk

|          |     |    |    |    |    |
|----------|-----|----|----|----|----|
| High Exp | 125 | 12 | 5  | 2  | 0  |
| Low Exp  | 125 | 13 | 1  | 0  | 0  |
|          | 0   | 5  | 10 | 15 | 20 |

Follow up time(year)
